# Supplementary material
Source: publisher site journal article supplement (https://www.spandidos-publications.com/6808/downloadSupplementary)
Supplement: Supplementary file 1 [file downloadSupplementary]

## Sheet: Sheet1
Table SXV. Cluster analysis of piwi-interacting RNA tissue samples.
Group	Sample_id	Cluster	Location	Coordinates:	Seq hit loci	Mapped reads (normalised)	norm.reads with 1T(1U)	norm.reads with 10A	piRNAs mapping to this cluster	Size [bp]:	Predicted directionality:	repeatmasker annotation	repeatmasker class	geneset annotation
tumor	CN-1-T	Cluster 1	chr1	249109212-249110732	8	272	98.9	0		1521	mono:minus	L1ME4a,FRAM,MER74B,MIR3	LINE/L1, SINE/Alu, LTR/ERVL, SINE/MIR	SH3BP5L
tumor	CN-1-T	Cluster 2	chr12	109677885-109678941	4	69	84.1	0		1057	mono:plus	AluJr4,(AATATT)n, (TAA)n, MIRb	SINE/Alu,Simple_repeat ,Simple_repeat,SINE/MIR	ACACB
tumor	CN-1-T	Cluster 3	chr14	106207839-106209397	25	52.3	53.1	57.1		1559	mono:minus			IGHG1
tumor	CN-1-T	Cluster 4	chr17	4619279-4621303	11	95	98.9	1.1		2025	mono:plus	(GGGGCT)n,AluSz6	Simple_repeat,SINE/Alu	ARRB2
tumor	CN-1-T	Cluster 5	chr17	19502483-19506696	139	4051.1	0.4	98.6	hsa-piR-15181,hsa-piR-15182,hsa-piR-20792,hsa-piR-22269,hsa-piR-32002,hsa-piR-32859	4214	mono:plus	AluY,A-rich,tRNA-Leu-TTA(m), tRNA-Gln-CAA_	SINE/Alu, Low_complexity, tRNA, tRNA	RP11-1113L8.6, RP11-1113L8.7, MTND1P14, TRNAQ41P
tumor	CN-1-T	Cluster 6	chr8	22993328-22995489	49	226.5	6.4	79.9		2162	mono:minus	(ATAA)n,MER47C,Tigger5b,FLAM_C	Simple_repeat, DNA/TcMar-Tigger, DNA/TcMar-Tigger, SINE/Alu	TNFRSF10D
tumor	CN-1-T	Cluster 7	chr8	130973535-130975008	10	403	82.1	0		1474	mono:minus	L2c,MIRb,AluJb,L3	LINE/L2, SINE/MIR, SINE/Alu, LINE/CR1
tumor	CN-1-T	Cluster 8	chr9	116139168-116141510	10	95	96.8	1.1		2343	mono:minus	(CCCGC)n,AluSx,AluYk2,tRNA-Glu-GAG_,MER39B,LTR5B	Simple_repeat,SINE/Alu, SINE/Alu, tRNA, LTR/ERV1, LTR/ERVK	HDHD3
tumor	CN-1-T	Cluster 9	chrX	53404386-53410149	31	143.5	80.5	3.5		5764	mono:minus	HAL1ME,MER5B,MIR3,MIRb,MER113A,L1ME3Cz,L1ME3C,MIR,L2c,MER4-int,L2d	LINE/L1, DNA/hAT-Charlie, SINE/MIR, SINE/MIR, DNA/hAT-Charlie, LINE/L1, LINE/L1, SINE/MIR, LINE/L2,LTR/ERV1,LINE/L2	SMC1A
tumor	CN-1-T	Cluster 10	chrX	55206629-55209853	142	4071.9	0.6	98.7	hsa-piR-32859, hsa-piR-32860	3225	mono:minus	tRNA-Gln-CAA_,tRNA-Leu-TTA(m)	tRNA, tRNA	MTND1P30, MTRNR2L10
tumor	S-113-T	Cluster 1	chr17	19502484-19506697	101	2294	0.6	98.4	hsa-piR-15181,hsa-piR-15182,hsa-piR-20792,hsa-piR-22269,hsa-piR-32002,hsa-piR-32859	4214	mono:plus	AluY, A-rich,tRNA-Leu-TTA(m), tRNA-Gln-CAA_	SINE/Alu, Low_complexity, tRNA, tRNA	RP11-1113L8.6, RP11-1113L8.7, MTND1P14, TRNAQ41P
tumor	S-113-T	Cluster 2	chr9	116136013-116140491	63	384.4	83.6	2.1	hsa-piR-18867	4479	mono:minus	MIRb,L2b,AluJb,(ATT)n,MIR3,AluSp,AluSg,(CCCGC)n,AluSx,AluYk2,tRNA-Glu-GAG_		HDHD3
tumor	S-113-T	Cluster 3	chrX	55206628-55209035	113	2295.7	0.4	98.4	hsa-piR-32859, hsa-piR-32860	2408	mono:minus	tRNA-Gln-CAA, tRNA-Leu-TTA(m)	tRNA, tRNA	MTND1P30, MTRNR2L10
tumor	S-156-T	Cluster 1	chr17	4619283-4621979	13	124	92.7	2.4		2697	mono:plus	(GGGGCT),AluSz6	Simple_repeat,SINE/Alu	ARRB2
tumor	S-156-T	Cluster 2	chr17	19502633-19506697	110	3075	0.5	98.6	hsa-piR-15181,hsa-piR-15182,hsa-piR-20792,hsa-piR-22269,hsa-piR-32002,hsa-piR-32859	4065	mono:plus	AluY,A-rich,tRNA-Leu-TTA(m), tRNA-Gln-CAA_	SINE/Alu, Low_complexity, tRNA, tRNA	RP11-1113L8.6, RP11-1113L8.7, MTND1P14, TRNAQ41P
tumor	S-156-T	Cluster 3	chr19	44301248-44303053	20	766	88.9	0.1		1806	mono:minus	MIR	SINE/MIR	LYPD5
tumor	S-156-T	Cluster 4	chr2	61412016-61413415	8	109	89.9	3.7		1400	mono:plus	(ATTTTAT)n	Simple_repeat	AHSA2
tumor	S-156-T	Cluster 5	chr2	219204550-219206704	17	84	82.1	2.4		2155	mono:plus	(CTCT)n,(CTCTC)n,FLAM_C,L2b	Simple_repeat,Simple_repeat,SINE/Alu,LINE/L2	PNKD
tumor	S-156-T	Cluster 6	chr9	116138217-116140491	11	86.7	90.8	2.3	hsa-piR-18867	2275	bi:plus-minus (split between 116139009 and 116139134)	MIR3,AluSp,AluSg,(CCCGC)n,AluSx,AluYk2,tRNA-Glu-GAG_	SINE/MIR,SINE/Alu, SINE/Alu,Simple_repeat,SINE/Alu,SINE/Alu,tRNA	HDHD3
tumor	S-156-T	Cluster 7	chrX	53338085-53339385	10	54.9	10.4	83.3		1301	mono:plus	AluJr4,HAL1,L4_B_Mam,MIRc,AluJo	SINE/Alu,LINE/L1, LINE/RTE-X, SINE/MIR, SINE/Alu
tumor	S-156-T	Cluster 8	chrX	53408598-53410046	14	118.5	86.9	0		1449	mono:minus	L2c,L2d,MIRb	LINE/L2, LINE/L2, SINE/MIR	SMC1A
tumor	S-158-T	Cluster 1	chr17	4619277-4621896	12	180	97.2	1.1		2620	mono:plus	(GGGGCT)n, AluSz6	Simple_repeat,SINE/Alu	ARBB2
tumor	S-158-T	Cluster 2	chr17	19502633-19506697	123	2742	1.2	97.1	hsa-piR-15181,hsa-piR-15182,hsa-piR-20792,hsa-piR-22269,hsa-piR-32002,hsa-piR-32859	4065	mono:plus	AluY, A-rich,tRNA-Leu-TTA(m), tRNA-Gln-CAA_	SINE/Alu, Low_complexity, tRNA, tRNA	RP11-1113L8.6, RP11-1113L8.7, MTND1P14, TRNAQ41P
tumor	S-158-T	Cluster 3	chr2	220496815-220499347	14	40	87.5	2.5		2533	mono:plus	(GAA)n,GA-rich,L3,MER91B	SINE/Alu, Low_complexity, LINE/CR1, DNA/hAT-Tip100	SLC4A3
tumor	S-158-T	Cluster 4	chr9	116138931-116140491	13	48.4	92.8	0		1561	mono:minus	AluSg,(CCCGC)n,AluSx,AluYk2,tRNA-Glu-GAG_	SINE/Alu, Simple_repeat, SINE/Alu, SINE/Alu, tRNA	HDHD3
tumor	S-158-T	Cluster 5	chrX	53407957-53409297	15	89	92.1	1.1		1341	mono:minus	L2d,L2c	LINE/L2, LINE/L2	SMC1A
tumor	S-158-T	Cluster 6	chrX	55206628-55209846	122	2723.2	1	97.9	hsa-piR-32859, hsa-piR-32860	3219	mono:minus	tRNA-Gln-CAA_,tRNA-Leu-TTA(m	tRNA, tRNA	MTND1P30, MTRNR2L10
tumor	S-166-T	Cluster 1	chr17	19503294-19506697	152	3945.2	1.1	97.9	hsa-piR-15181,hsa-piR-15182,hsa-piR-20792,hsa-piR-22269,hsa-piR-32002,hsa-piR-32859	3404	mono:plus	AluY, A-rich,tRNA-Leu-TTA(m), tRNA-Gln-CAA_	SINE/Alu, Low_complexity, tRNA, tRNA	RP11-1113L8.6, RP11-1113L8.7, MTND1P14, TRNAQ41P
tumor	S-166-T	Cluster 2	chr19	44302071-44303885	14	400	79.8	0.8	hsa-piR-15436	1815	mono:minus	AluSx3, (TCTTCC)n	SINE/Alu, Simple_repeat	LYPD5
tumor	S-166-T	Cluster 3	chr2	61413387-61415497	12	88	87.5	3.4		2111	bi:plus-minus (split between 61413393 and 61413575)	(CAAT)n	Simple_repeat	AHSA2, USP34
tumor	S-166-T	Cluster 4	chr8	22993585-22995495	34	105	1.9	85.7		1911	mono:minus	(ATAA)n,MER47C,Tigger5b,FLAM_C	Simple_repeat,DNA/TcMar-Tigger,DNA/TcMar-Tigger, SINE/Alu	TNFRSF10D
tumor	S-166-T	Cluster 5	chr8	27290927-27292029	11	96	96.9	0		1103	mono:plus			PTK2B
tumor	S-166-T	Cluster 6	chr9	116139162-116142438	13	65.1	84.6	3.1	hsa-piR-326	3277	mono:minus	(CCCGC)n,AluSx,AluYk2,tRNA-Glu-GAG_,MER39B,LTR5B	Simple_repeat,SINE/Alu,SINE/Alu,tRNA,LTR/ERV1,LTR/ERVK	HDHD3
tumor	S-166-T	Cluster 7	chrX	53408597-53410992	28	222	93.7	0.5		2396	mono:minus	L2c,L2d,MIRb	LINE/L2, LINE/L2, SINE/MIR	SMC1A
normal	R-2-N	Cluster 1	chr1	564496-570296	1322	11940.5	77.2	11.7		5801	bi:minus-plus (split between 564928 and 564952)	tRNA-Gln-CAA_,tRNA-Ser-TCA(m)	tRNA, tRNA	MTND1P23,MTND2P28, hsa-mir-6723, RP5-857K21.7, MTATP8P1,MTATP6P1, RP5-857K21.11
normal	R-2-N	Cluster 2	chr1	20977110-20982233	14	22	40.9	77.3		5124	mono:minus	AluY,AluSx,(T)n,AluJr	SINE/Alu,SINE/Alu,Simple_repeat, SINE/Alu	PINK1,PINK1-AS, AL391357.1, DDOST
normal	R-2-N	Cluster 3	chr1	39578118-39579969	11	70.5	97.2	0		1852	mono:plus	AluSz6,FRAM,AluSx,tRNA-Glu-GAA	SINE/Alu,SINE/Alu, SINE/Alu, tRNA
normal	R-2-N	Cluster 4	chr17	3800172-3803023	9	15	0	80		2852	mono:minus	MER5A,MER3,FRAM	DNA/hAT-Charlie, DNA/hAT-Charlie, SINE/Alu	P2RX1
normal	R-2-N	Cluster 5	chr17	19503293-19506695	63	554.5	0.8	96.3		3403	mono:plus	AluY,A-rich,tRNA-Leu-TTA(m),tRNA-Gln-CAA_	SINE/Alu, Low_complexity, tRNA, tRNA	RP11-1113L8.6, RP11-1113L8.7, MTND1P14, TRNAQ41P
normal	R-2-N	Cluster 6	chr20	5902996-5905811	9	19	0	84.2		2816	mono:plus	(GAG)n,(CAGGAGA)n,MER5B,MER5A	Simple_repeat,Simple_repeat,DNA/hAT-Charlie,DNA/hAT-Charlie	CHGB
normal	R-2-N	Cluster 7	chr8	41515494-41517987	39	3352	99.8	0		2494	mono:plus	AluJr,MIRc,Tigger17a,AluSz,(ATAA)n,Tigger19a	SINE/Alu,SINE/MIR,DNA/TcMar-Tigger,SINE/Alu, Simple_repeat, DNA/TcMar-Tigger	MIR486
normal	R-2-N	Cluster 8	chr9	116140459-116141623	12	49.4	88.7	6.1		1165	bi:minus-plus (split between 116140468 and 116141598)	tRNA-Glu-GAG_,AluSx,MER39B,LTR5B	tRNA,SINE/Alu,LTR/ERV1, LTR/ERVK
normal	R-2-N	Cluster 9	chrX	53408599-53409917	8	37	94.6	2.7		1319	mono:minus	L2c,L2d,MIRb	LINE/L2, LINE/L2, SINE/MIR	SMC1A
normal	R-2-N	Cluster 10	chrX	55206628-55209036	65	555.3	1.5	96.3		2409	mono:minus	tRNA-Gln-CAA_, tRNA-Leu-TTA(m)	tRNA, tRNA	MTND1P30, MTRNR2L10
normal	R-30-N	Cluster 1	chr15	85923814-85925166	25	861	99.1	0.7		1353	mono:plus	(TT)n	Simple_repeat	AKAP13
normal	R-30-N	Cluster 2	chr17	19503294-19506697	117	2950.3	0.7	98.7	hsa-piR-15181,hsa-piR-15182,hsa-piR-20792,hsa-piR-22269,hsa-piR-32002,hsa-piR-32859	3404	mono:plus	AluY,A-rich,tRNA-Leu-TTA(m),tRNA-Gln-CAA_	SINE/Alu, Low_complexity, tRNA, tRNA	RP11-1113L8.6, RP11-1113L8.7, MTND1P14, TRNAQ41P
normal	R-30-N	Cluster 3	chr19	1248598-1249974	35	217	1.4	80.2		1377	mono:plus	(GCCCC)n,(GCCCGC)n	Simple_repeat,Simple_repeat	MIDN
normal	R-30-N	Cluster 4	chr9	116139048-116140491	10	53.2	88.7	0		1444	mono:minus	(CCCGC)n,AluSx, AluYk2,tRNA-Glu-GAG_	Simple_repeat,SINE/Alu,SINE/Alu, tRNA	HDHD3
normal	R-30-N	Cluster 5	chrX	55206629-55207977	119	2951.4	0.5	99		1349	mono:minus	tRNA-Gln-CAA, tRNA-Leu-TTA(m)	tRNA, tRNA	MTND1P30, MTRNR2L10
normal	S-144-N	Cluster 1	chr10	70047359-70048392	7	12	50	58.3		1034	mono:minus	AluS,MIRb	SINE/Alu, SINE/MIR	PBLD
normal	S-144-N	Cluster 2	chr16	46962947-46964600	5	13	0	76.9		1654	mono:plus			GPT2
normal	S-144-N	Cluster 3	chr17	19502633-19506696	83	820.6	1	95.7		4064	mono:plus	AluY,A-rich,tRNA-Leu-TTA(m)	SINE/Alu, Low_complexity, tRNA, tRNA	RP11-1113L8.6, RP11-1113L8.7, MTND1P14, TRNAQ41P
normal	S-144-N	Cluster 4	chr8	17501323-17502622	7	12	50	50		1300	mono:minus			PDGFRL,MTUS1
normal	S-144-N	Cluster 5	chrX	55206630-55209854	72	807.2	1	97.9		3225	mono:minus	tRNA-Gln-CAA_, tRNA-Leu-TTA(m)	tRNA, tRNA	MTND1P30, MTRNR2L10
normal	S-144-N	Cluster 6	chrX	106959129-106960280	4	12	66.7	66.7		1152	mono:minus	(CTCCCT)n, (CCCTG)n,(GGCT)n	Simple_repeat,Simple_repeat	TSC22D3
normal	S-156-N	Cluster 1	chr17	19504627-19506700	72	1488.7	0.2	99.3		2074	mono:plus	A-rich, tRNA-Leu-TTA(m),AluY, tRNA-Gln-CAA_	Low_complexity, tRNA, SINE/Alu, tRNA	RP11-1113L8.6, RP11-1113L8.7, MTND1P14, TRNAQ41P
normal	S-156-N	Cluster 2	chr9	116139154-116140491	10	57.8	96.5	0		1338	mono:minus	(CCCGC)n,AluSx,AluYk2,tRNA-Glu-GAG_	Simple_repeat,SINE/Alu,SINE/Alu,tRNA	HDHD3
normal	S-71-N	Cluster 1	chr9	116138968-116140491	11	55.5	96.4	0		1524	mono:minus	(CCCGC),AluSx,AluYk2,tRNA-Glu-GAG_	Simple_repeat,SINE/Alu,SINE/Alu,tRNA	HDHD3
